# Supplementary material
Source: PubMed Central journal article supplement (PMC9891852)
Supplement: NIHMS1865663-supplement-1.pdf [file NIHMS1865663-supplement-1.pdf]

**Supplemental tables**

**Table S1. Top ten upregulated and downregulated DEPs in ALDH<sup>high</sup> cells**

| <b>Top Ten Downregulated Proteins in ALDH<sup>high</sup> cells</b> |                                                               |                      |             |         |
|--------------------------------------------------------------------|---------------------------------------------------------------|----------------------|-------------|---------|
| Abbreviation                                                       | Full Name                                                     | Subcellular location | Fold change | p value |
| VTN                                                                | vitronectin                                                   | Extracellular Space  | -6.995      | 0.008   |
| HBB                                                                | hemoglobin subunit beta                                       | Cytoplasm            | -6.130      | 0.004   |
| HBA2                                                               | hemoglobin subunit alpha 2                                    | Extracellular Space  | -4.104      | 0.014   |
| SUGP1                                                              | SURP and G-patch domain containing 1                          | Nucleus              | -1.650      | 0.017   |
| PARL                                                               | presenilin associated rhomboid like                           | Cytoplasm            | -1.445      | 0.006   |
| GHITM                                                              | growth hormone inducible transmembrane protein                | Cytoplasm            | -1.426      | 0.041   |
| MOCS3                                                              | molybdenum cofactor synthesis 3                               | Cytoplasm            | -1.412      | 0.011   |
| VKORC1                                                             | vitamin K epoxide reductase complex subunit 1                 | Cytoplasm            | -1.402      | 0.043   |
| ERCC2                                                              | ERCC excision repair 2, TFIIH core complex helicase subunit   | Nucleus              | -1.388      | 0.001   |
| XPC                                                                | XPC complex subunit, DNA damage recognition and repair factor | Nucleus              | -1.373      | 0.019   |
| <b>Top Ten Upregulated Proteins in ALDH<sup>high</sup> cells</b>   |                                                               |                      |             |         |
| Abbreviation                                                       | Full Name                                                     | Location             | Fold change | p value |
| TIMM9                                                              | translocase of inner mitochondrial membrane 9                 | Cytoplasm            | 2.158       | 0.019   |
| PEX19                                                              | peroxisomal biogenesis factor 19                              | Cytoplasm            | 1.707       | 0.012   |
| SF3B5                                                              | splicing factor 3b subunit 5                                  | Nucleus              | 1.430       | 0.012   |
| WDCP                                                               | WD repeat and coiled coil containing                          | Other                | 1.418       | 0.001   |
| DPY30                                                              | dpy-30 histone methyltransferase complex regulatory subunit   | Nucleus              | 1.391       | 0.025   |
| MPG                                                                | N-methylpurine DNA glycosylase                                | Nucleus              | 1.340       | 0.012   |
| COX5A                                                              | cytochrome c oxidase subunit 5A                               | Cytoplasm            | 1.283       | 0.006   |
| CCDC50                                                             | coiled-coil domain containing 50                              | Cytoplasm            | 1.264       | 0.033   |
| JPT1                                                               | Jupiter microtubule associated homolog 1                      | Nucleus              | 1.263       | 0.011   |
| ARPC5                                                              | actin related protein 2/3 complex subunit 5                   | Cytoplasm            | 1.234       | 0.008   |

Differentially expressed proteins (DEPs) in ALDH<sup>high</sup> cells (relative to ALDH<sup>low</sup> cells) were identified using a two-tailed Student's unpaired t-test, with a cutoff p value < 0.05. The differential abundance of proteins was expressed by the fold change, which was calculated based on the ratio of the protein abundance in ALDH<sup>high</sup> cells versus that in ALDH<sup>low</sup> cells. Fold changes of up-regulated proteins are positive numbers, whereas the fold changes of down-regulated proteins are negative numbers. Top ten upregulated and downregulated proteins were ranked based on fold change value.

**Table S2. Abbreviation list**

| <b>Abbreviations</b> | <b>Full Name</b>                                            |
|----------------------|-------------------------------------------------------------|
| AGPAT5               | 1-acylglycerol-3-phosphate O-acyltransferase 5              |
| ALDH                 | Aldehyde dehydrogenase                                      |
| ARG2                 | arginase 2                                                  |
| ATP5F1C              | ATP synthase F1 subunit gamma                               |
| ATP5MG               | ATP synthase membrane subunit g                             |
| CDIPT                | CDP-diacylglycerol--inositol 3-phosphatidyltransferase      |
| COX15                | cytochrome c oxidase assembly homolog COX15                 |
| COX5A                | cytochrome c oxidase subunit 5A                             |
| CRC                  | colorectal cancer cells                                     |
| CSC                  | colon stem cell                                             |
| CYB5B                | cytochrome b5 type B                                        |
| DBI                  | diazepam binding inhibitor, acyl-CoA binding protein        |
| DEPs                 | Differentially expressed proteins                           |
| DHODH                | dihydroorotate dehydrogenase (quinone)                      |
| DOCK9                | dedicator of cytokinesis 9                                  |
| ERCC2                | ERCC excision repair 2, TFIIH core complex helicase subunit |
| ETC                  | mitochondrial electron transport chain                      |
| FDR                  | false discovery rate                                        |
| GO                   | Gne Ontology                                                |
| HBA2                 | hemoglobin subunit alpha 2                                  |
| HBB                  | hemoglobin subunit beta                                     |
| HEBP2                | heme binding protein 2                                      |
| IPA                  | Ingenuity pathway analysis                                  |
| KRT1                 | keratin 1                                                   |
| KRT10                | keratin 10                                                  |
| KRT2                 | keratin 2                                                   |
| KRT9                 | keratin 9                                                   |
| LIG3                 | DNA ligase 3                                                |
| NCSTN                | nicastrin                                                   |
| NDUFB1               | NADH:ubiquinone oxidoreductase subunit B1                   |
| NDUFB5               | NADH:ubiquinone oxidoreductase subunit B5                   |
| NDUFB6               | NADH:ubiquinone oxidoreductase subunit B6                   |
| NDUFS3               | NADH:ubiquinone oxidoreductase core subunit S3              |
| NDUFS8               | NADH:ubiquinone oxidoreductase core subunit S8              |
| NER                  | nucleotide excision repair                                  |
| PAM16                | presequence translocase associated motor 16                 |

|         |                                                                                                   |
|---------|---------------------------------------------------------------------------------------------------|
| PARL    | presenilin associated rhomboid like                                                               |
| PEX11B  | peroxisomal biogenesis factor 11 beta                                                             |
| PEX19   | peroxisomal biogenesis factor 19                                                                  |
| PLK1    | polo like kinase 1                                                                                |
| POLD2   | DNA polymerase delta 2, accessory subunit                                                         |
| POLE3   | DNA polymerase epsilon 3, accessory subunit                                                       |
| POLR1A  | RNA polymerase I subunit A                                                                        |
| POLR2A  | RNA polymerase II subunit A                                                                       |
| PRDX3   | peroxiredoxin 3                                                                                   |
| PSAP    | prosaposin                                                                                        |
| ROS     | reactive oxygen species                                                                           |
| SLC25A5 | solute carrier family 25 member 5                                                                 |
| SMARCA5 | SWI/SNF related, matrix associated, actin dependent regulator of chromatin, subfamily a, member 5 |
| STAT3   | signal transducer and activator of transcription 3                                                |
| SUGP1   | SURP and G-patch domain containing 1                                                              |
| TIMM13  | translocase of inner mitochondrial membrane 13                                                    |
| TIMM23  | translocase of inner mitochondrial membrane 23                                                    |
| TIMM9   | translocase of inner mitochondrial membrane 9                                                     |
| VDAC1   | voltage dependent anion channel 1                                                                 |
| VDAC3   | voltage dependent anion channel 3                                                                 |
| VTN     | vitronectin                                                                                       |
| XAB2    | XPA binding protein 2                                                                             |
| XPC     | XPC complex subunit, DNA damage recognition and repair factor                                     |
